# Supplementary material for: Tailoring the molecular size of alkylamine modifiers for fabricating efficient and stable inverted CsPbI3 perovskite solar cells
Source: Royal Society of Chemistry journal article supplement (doi:10.1039/d4tc01871k), 2024-01-01
Supplement: d4tc01871k2.pdf [file d4tc01871k2.pdf]

## Supporting information

### **Tailoring Molecular Size of Alkylamine Modifiers towards Efficient and Stable Inverted CsPbI<sub>3</sub> Perovskite Solar Cells**

Zhongyu Liu,<sup>a,b</sup> Hongwei Wang,<sup>a</sup> Haijun Han,<sup>b</sup> Hong Jiang,<sup>b</sup> Ning Liu,<sup>b</sup> Jianwei Wang,<sup>b</sup> Jing Zhang,<sup>b</sup> Tian Cui,<sup>\*a</sup> and Xiaohui Liu,<sup>\*a,b</sup>

<sup>a</sup> Institute of High Pressure Physics, School of Physical Science and Technology,  
Ningbo University, Ningbo 315211, China

<sup>b</sup> Department of Microelectronic Science and Engineering, School of Physical Science  
and Technology, Ningbo University, Ningbo 315211, China

\* E-mail: liuxiaohui@nbu.edu.cn; cuitian@nbu.edu.cn.

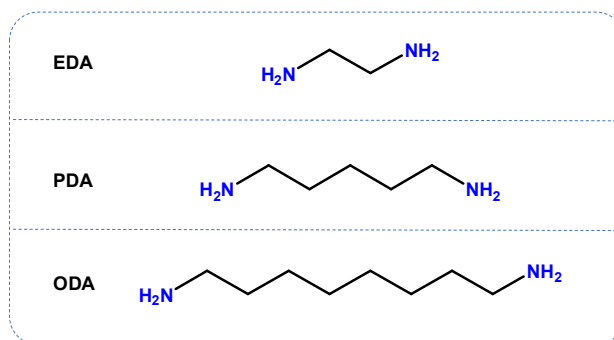

**Fig. S1** The chemical structures of the three alkylamines (EDA, PDA, and ODA).

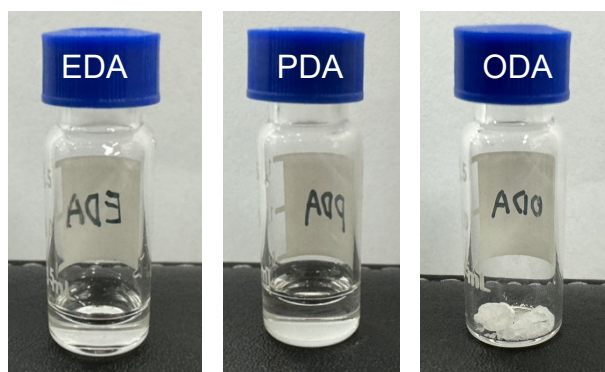

**Fig. S2** The physical appearances of EDA, PDA, and ODA molecules under normal temperature and pressure.

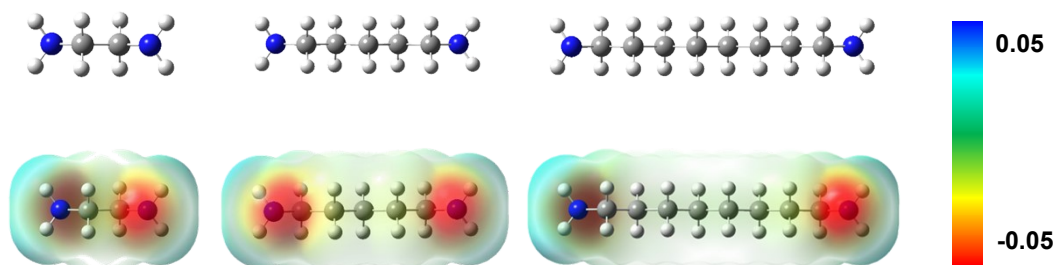

**Fig. S3** The ESP analysis of EDA, PDA and ODA molecules.

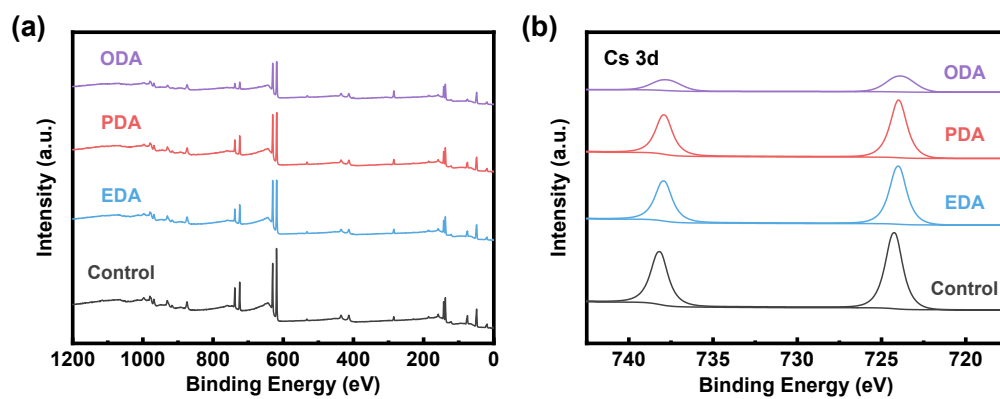

**Fig. S4** (a) Full-scan XPS spectra of control, EDA, PDA, and ODA treated CsPbI<sub>3</sub> films. (b) XPS spectra of Cs 3d.

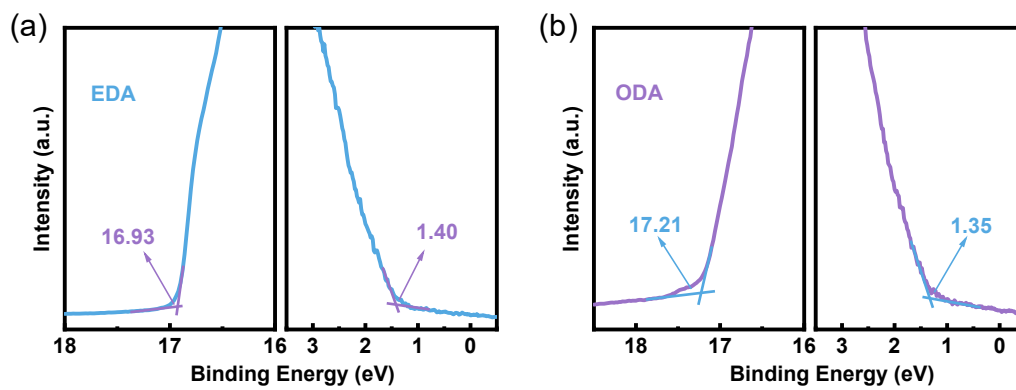

**Fig. S5** UPS spectra of (a) EDA, and (b) ODA treated perovskite films.

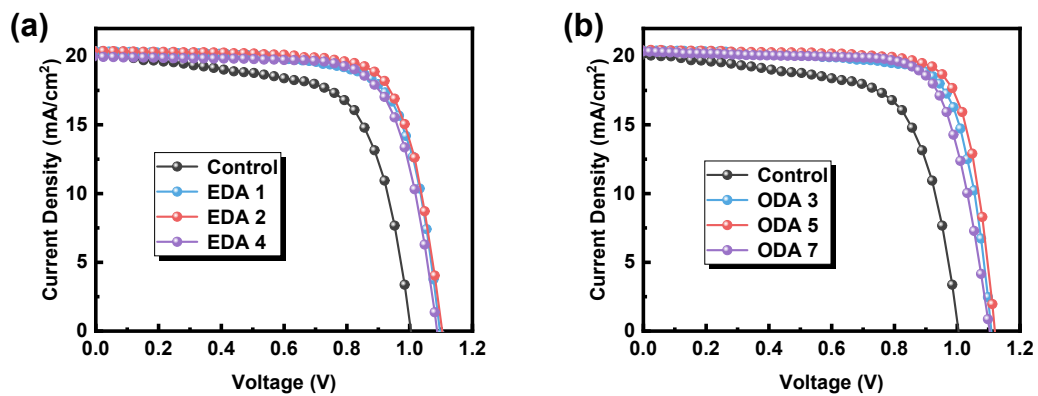

Fig. S6  $J$ - $V$  curve of devices treated with different concentration of (a) EDA, and (b) ODA.

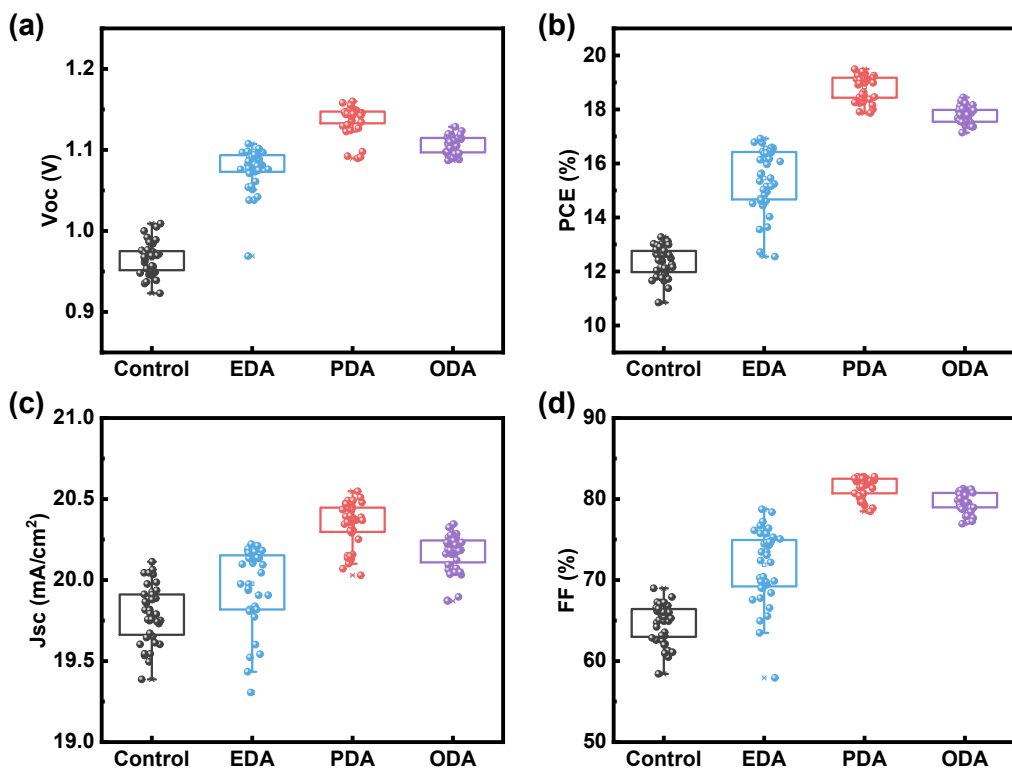

Fig. S7 Box data statistics charts of (a)  $V_{oc}$ , (b) PCE, (c)  $J_{sc}$ , and (d) FF.

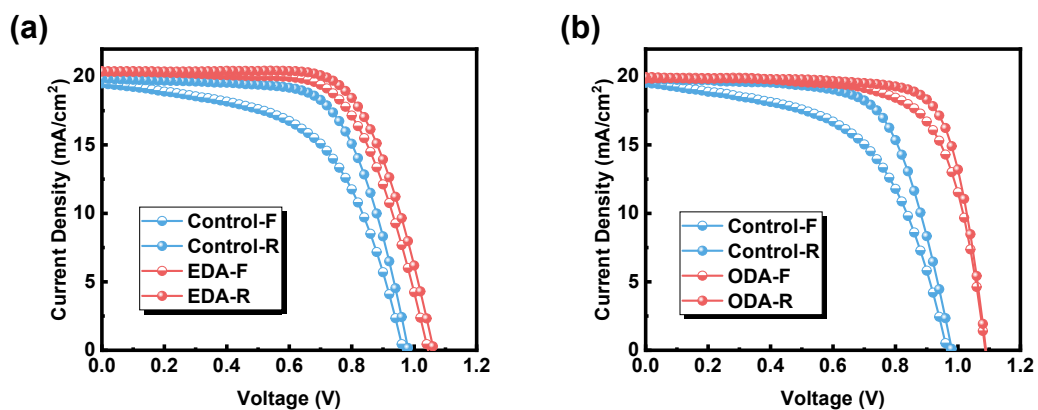

**Fig. S8**  $J$ - $V$  curves measured in forward and reverse scan directions of (a) EDA, and (b) ODA treated devices.

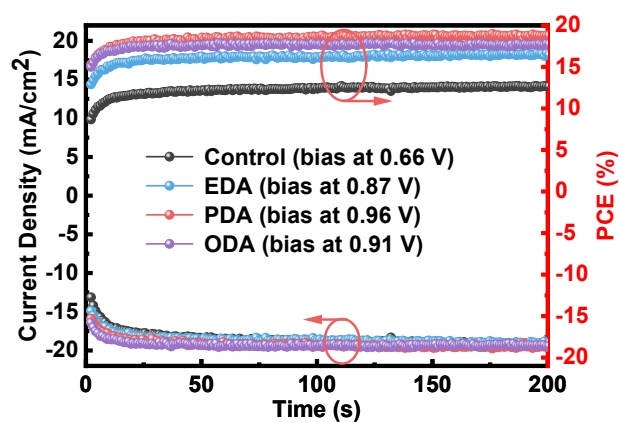

**Fig. S9** Steady-state photocurrent and output PCE at the maximum power point of control, EDA, PDA, and ODA treated CsPbI<sub>3</sub> devices.

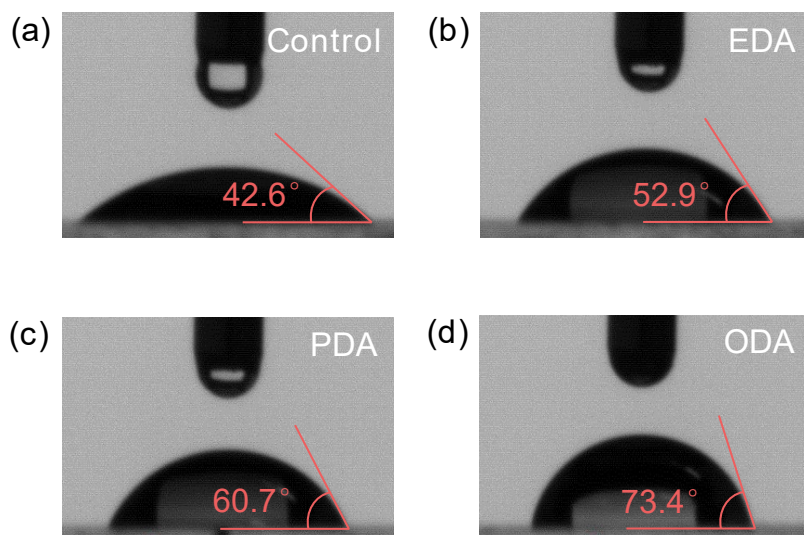

**Fig. S10** The contact angle of water droplets on (a) control, (b) EDA, (c) PDA, and (d) ODA treated CsPbI<sub>3</sub> films, respectively.

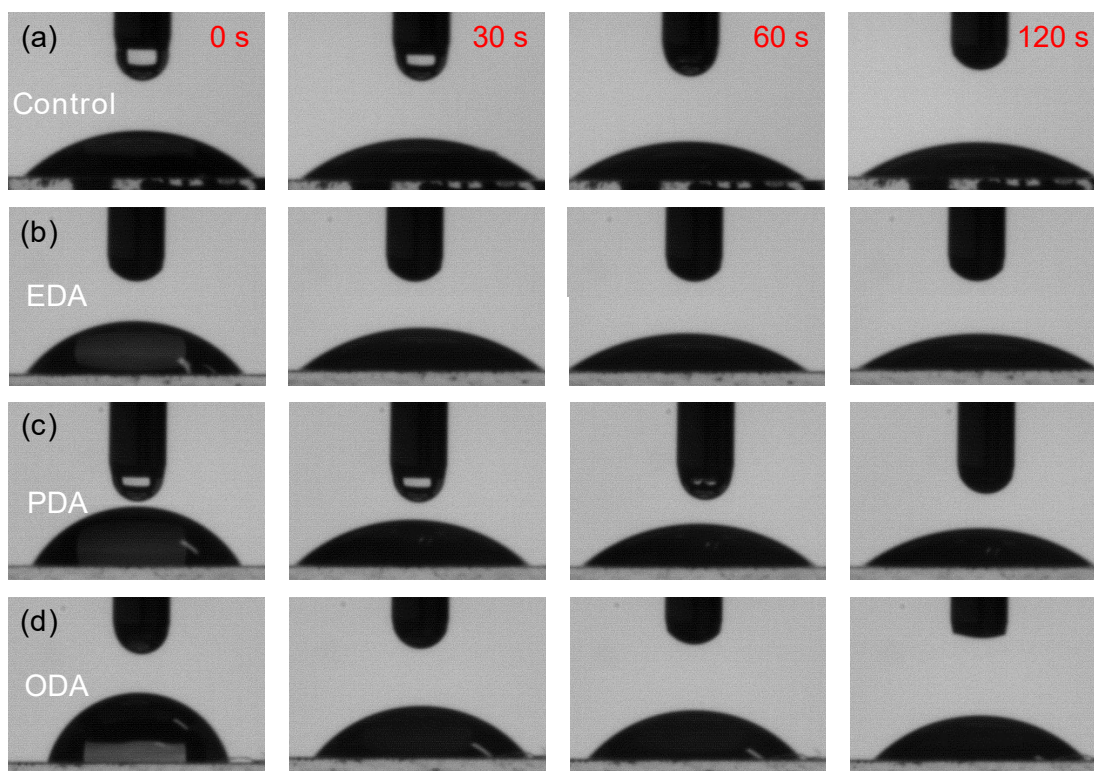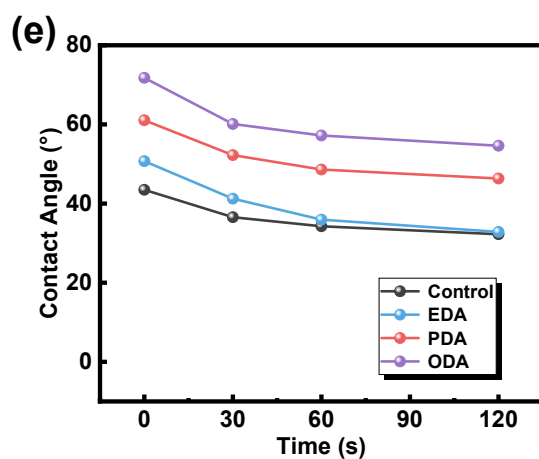

**Fig. S11** Contact angle images of (a) control, (b) EDA, (c) PDA and (d) ODA treated films captured at different time, respectively; (e) Contact angle versus duration of exposure of four films.

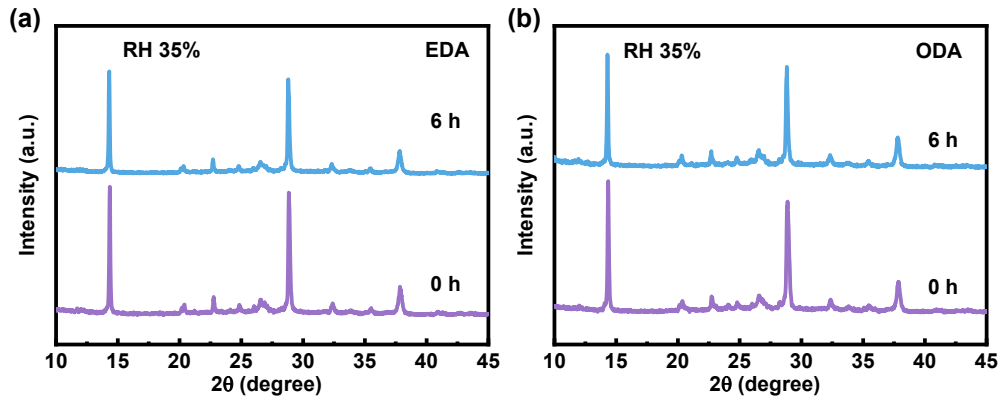

**Fig. S12** The evolution of XRD patterns of (a) EDA, and (b) ODA treated  $\text{CsPbI}_3$  films.

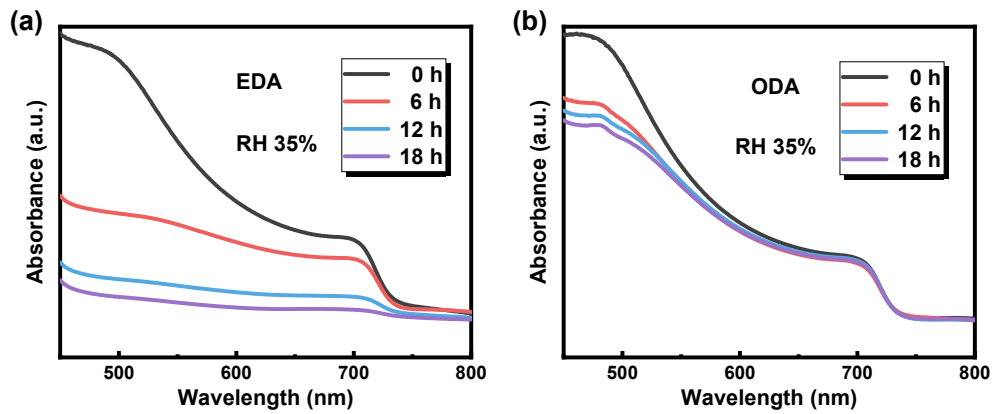

**Fig. S13** UV-vis spectra of (a) EDA, and (b) ODA treated  $\text{CsPbI}_3$  films.



**Table S1** The basic physical properties of EDA, PDA, and ODA molecules.

| Modifier                   | EDA         | PDA            | ODA            |
|----------------------------|-------------|----------------|----------------|
| Formula                    | $C_2H_8N_2$ | $C_5H_{14}N_2$ | $C_8H_{20}N_2$ |
| Physical appearance (25°C) | Liquid      | Liquid         | Solid          |
| Molecular weight           | 60.1        | 102.2          | 144.2          |
| Melting point (°C)         | 8.5         | 9              | 50             |
| Boiling point (°C)         | 116         | 178            | 225            |
| Vapor pressure (kPa)       | 1.21        | 0.13           | <0.01          |

**Table S2** Fitting parameters of the TRPL spectra of control, EDA, PDA, and ODA treated CsPbI<sub>3</sub> films.

| Samples | A <sub>1</sub> | $\tau_1$ /ns | A <sub>2</sub> | $\tau_2$ /ns | $\tau_{avg}$ /ns |
|---------|----------------|--------------|----------------|--------------|------------------|
| Control | 2.32           | 11.79        | 88.23          | 5.37         | 5.72             |
| EDA     | 2.16           | 10.01        | 1.79           | 24.71        | 19.88            |
| PDA     | 1.06           | 19.05        | 1.06           | 52.26        | 43.39            |
| ODA     | 11.23          | 6.64         | 0.90           | 45.22        | 20.26            |

**Table S3** The band structure parameters of control, EDA, PDA, and ODA treated CsPbI<sub>3</sub> films, respectively.

| Samples | $E_{\text{cutoff}}$ (eV) | $E_{\text{onset}}$ (eV) | VB (eV) | CB (eV) | $E_F$ (eV) |
|---------|--------------------------|-------------------------|---------|---------|------------|
| Control | 16.84                    | 1.30                    | 5.68    | 4.00    | 4.38       |
| EDA     | 16.93                    | 1.40                    | 5.69    | 4.01    | 4.29       |
| PDA     | 16.99                    | 1.56                    | 5.79    | 4.11    | 4.23       |
| ODA     | 17.21                    | 1.35                    | 5.36    | 3.68    | 4.01       |

**Table S4** The photovoltaic parameters of devices based on different concentrations of EDA, PDA, and ODA solutions treatment.

| Sample (mg/mL) | $V_{oc}$ (V) | $J_{sc}$ (mA/cm <sup>2</sup> ) | FF (%) | PCE (%) |
|----------------|--------------|--------------------------------|--------|---------|
| Control        | 0.997        | 20.04                          | 67.24  | 13.43   |
| EDA 1          | 1.096        | 20.24                          | 73.32  | 16.26   |
| EDA 2          | 1.105        | 20.18                          | 75.28  | 16.79   |
| EDA 4          | 1.077        | 20.12                          | 72.41  | 15.69   |
| PDA 4          | 1.117        | 20.35                          | 82.95  | 18.85   |
| PDA 6          | 1.151        | 20.39                          | 83.18  | 19.52   |
| PDA 8          | 1.105        | 20.27                          | 82.31  | 18.43   |
| ODA 3          | 1.108        | 20.24                          | 80.45  | 18.04   |
| ODA 5          | 1.116        | 20.26                          | 81.34  | 18.39   |
| ODA 7          | 1.101        | 20.21                          | 77.38  | 17.22   |

**Table S5** The photovoltaic parameters of the control, EDA, PDA, and ODA treated CsPbI<sub>3</sub> PSCs.

| Sample  | $V_{OC}$ (V)            | $J_{SC}$ (mA/cm <sup>2</sup> ) | FF (%)                | PCE (%)               |
|---------|-------------------------|--------------------------------|-----------------------|-----------------------|
| Control | 0.997<br>(0.966±0.0194) | 20.04<br>(19.79±0.18)          | 67.24<br>(64.77±2.59) | 13.43<br>(12.37±0.55) |
| EDA     | 1.105<br>(1.077±0.025)  | 20.18<br>(19.98±0.24)          | 75.28<br>(71.87±4.43) | 16.79<br>(15.46±1.14) |
| PDA     | 1.151<br>(1.137±0.017)  | 20.39<br>(20.34±0.13)          | 83.18<br>(81.57±1.24) | 19.52<br>(18.86±0.46) |
| ODA     | 1.116<br>(1.106±0.010)  | 20.26<br>(20.17±0.11)          | 81.34<br>(79.67±1.18) | 18.39<br>(17.78±0.30) |
